# Supplementary material
Source: publisher figshare collection journal article supplement (https://tandf.figshare.com/ndownloader/files/15222146)
Supplement: Supplementary file 1 [file 15222146]

## **Supplementary Data**

Enhanced Myelination with Concomitant Ultrastructural Irregularities following Prenatal  
Exposure to Ambient Particulate Matter in the Mouse

Carolyn Klocke, Valeriia Sherina, Uschi M. Graham, Jakob Gunderson, Joshua L. Allen,  
Marissa Sobolewski, Jason L. Blum, Judith T. Zelikoff, and Deborah A. Cory-Slechta

## Supplementary methods

### ***Transmission electron microscopy (TEM) and ultrastructural myelin measurements***

Tissue was prepared for high-resolution EM as described in Materials and Methods. Myelin *g*-ratio and myelin sheath integrity scores were determined using ImageJ software (National Institutes of Health, Bethesda, MD) by a blinded experimenter.

For preliminary *g*-ratio analysis, axons selected for analysis ( $N = 100$  axons/sample) were sampled from  $\geq 3$  fields in the midbody of the CC and had the appearance of completed myelination, i.e. complete myelin wrapping without delamination or damage. Selected axons were of varying diameters to assess whether myelination status was consistent across axons of different caliber. Cross-sectional axonal area was determined by hand-tracing the circumference of each axon without measuring myelin, and then again with the inclusion of the myelin sheath (myelinated axonal area). Axonal diameter (with and without myelin) was mathematically derived from each area measurement to prevent bias and *g*-ratio was calculated as follows:  $g = d_i/d_o$ , where  $d_i$  = inner axon diameter (also referred to as axon caliber) and  $d_o$  = diameter of axon plus myelin, i.e. outer myelinated diameter.

Myelin integrity scoring was determined for a minimum of 100 axons in 3 fields using ImageJ. Each stage of myelination was scored using a numeric designation as follows: (1) unmyelinated axons, (2) partially myelinated axons, (3) completely myelinated axons with intact myelin, and (4) completely myelinated axons with damage. This scoring paradigm allowed the quantification of axons within each field (one field =  $\sim 696.8 \mu\text{m}^2$ ). The average total axons per field is reported in **Figure S2d**.

### ***Statistical analyses for EM experiments***

Statistical analyses were conducted using JMP Pro 12.0 (SAS Institute Inc., Cary, NC). Myelin thickness, axon caliber, myelin *g*-ratio, myelin integrity scoring, and axon quantification were analyzed separately by sex or exposure via one-way ANOVA. Sexes were compared within exposure groups to determine any incidence of sex-specific effects. Linear regression and correlation analyses of both *g*-ratio and myelin thickness vs. axon caliber were performed with exposure group (CAPs or Air), axon caliber, and sex as between-group factors. Due to the limited sample size and exploratory nature of ultrastructural assessments, *post hoc* analyses for multiple comparisons were not performed. The tissue section/visual field was the experimental unit (i.e. replicate) for measures of myelin sheath thickness, *g*-ratio, axon caliber, myelin integrity scoring, and axon quantification. For correlative and linear regression analyses, each axon measurement was plotted individually. *P*-values  $\leq 0.05$  were considered statistically significant.

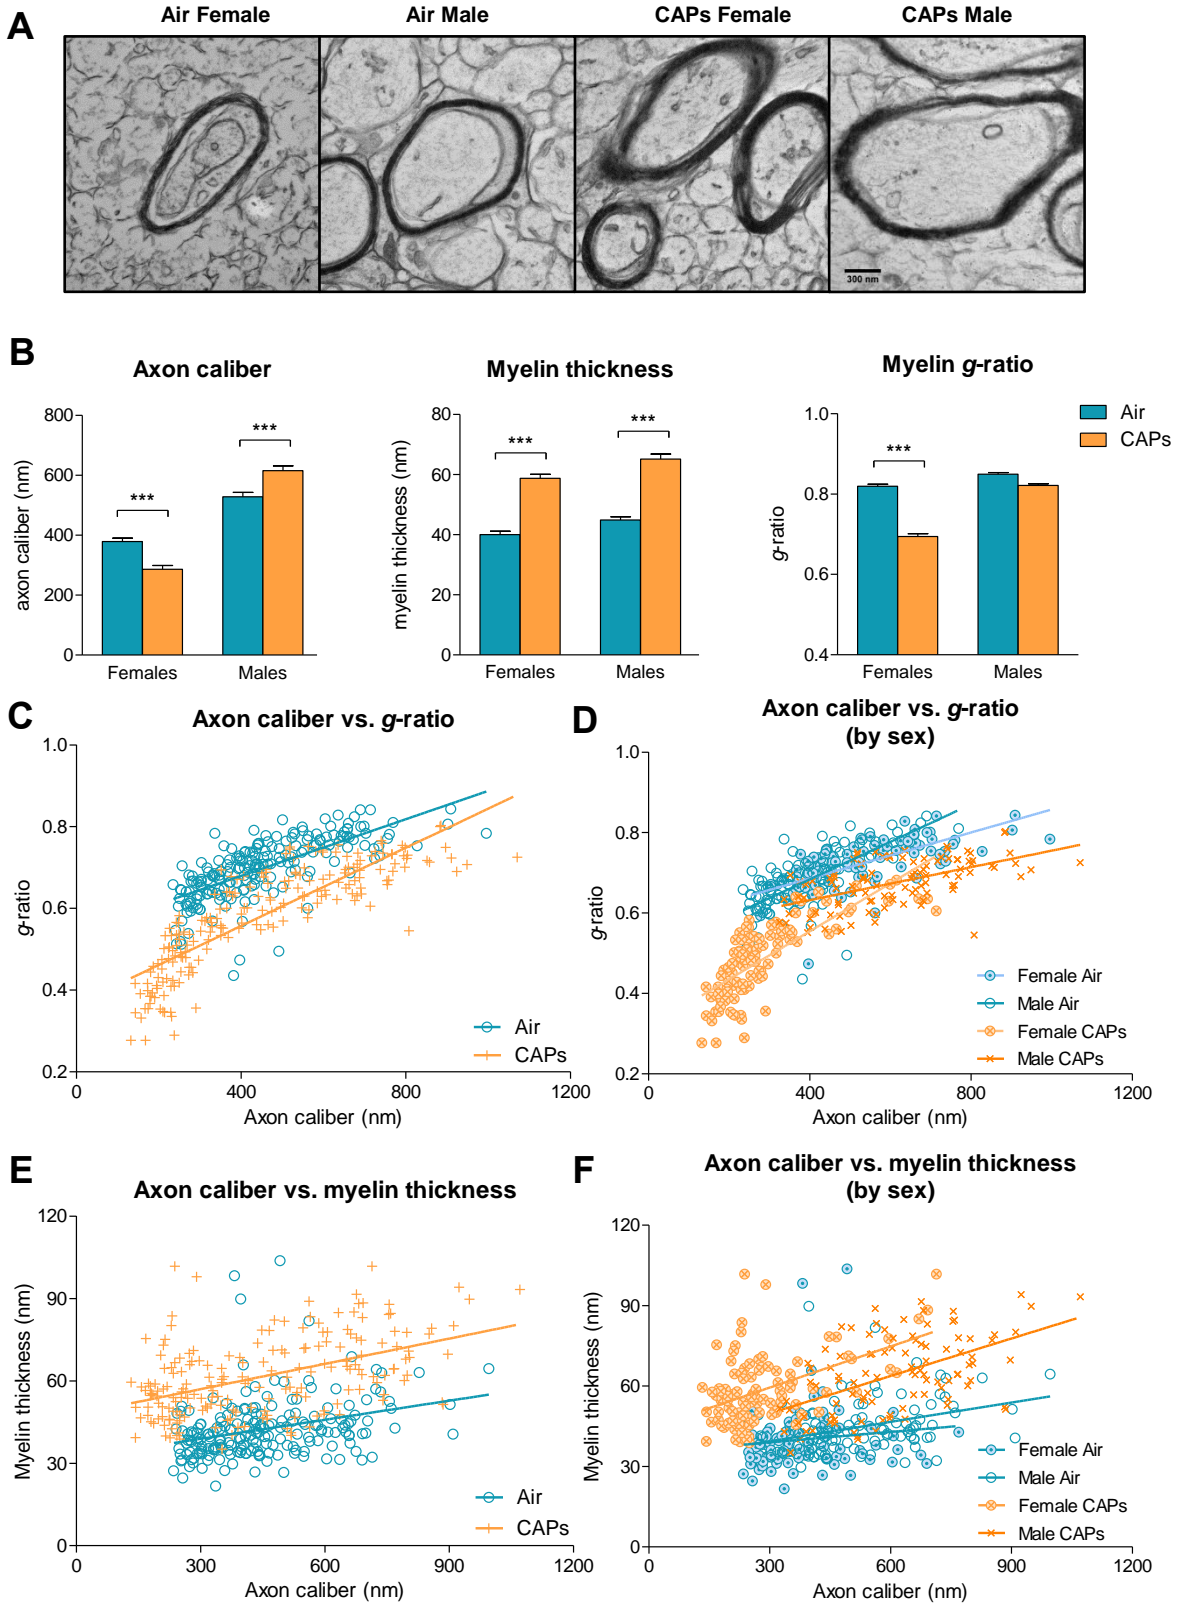

**Figure S1: Gestational CAPs exposure alters the trajectory of corpus callosum (CC) axon caliber, myelin thickness, and *g*-ratio at PND12. (Legend on following page.)**

**Figure S1 (continued):** Tissue from the midbody CC was prepared for electron microscopy (EM) and imaged. Axon caliber (i.e. diameter) and myelin thickness were determined using ImageJ and used to calculate *g*-ratio. **A)** Representative images from each exposure group. Scale bar represents 300 nm. **B)** CAPs exposure altered axon caliber in a sex-specific manner. Myelin thickness was increased in both sexes as a result of gestational CAPs exposure with a corresponding decrease in *g*-ratio in CAPs-exposed females. Data represent mean  $\pm$  SEM of 100 axons per animal imaged in at least 3 fields (N = 1 animal/sex/exposure). Statistical outcome: \*\*\* $p < 0.0001$ . **C-D)** The correlative relationship of axon caliber and *g*-ratio was affected by prenatal CAPs exposure ( $F_{3,399} = 352.8, p < 0.0001$ ). This linear relationship was significantly sex-specific ( $p = 0.001$ ); therefore, sexes are combined in **C** (Air:  $r^2 = .69, p < 0.0001$ ; CAPs:  $r^2 = 0.83, p < 0.0001$ ; N = 2 animals/exposure) and separate in **D** (Air female:  $r^2 = 0.66, p < 0.0001$ ; Air male:  $r^2 = 0.66, p < 0.0001$ ; CAPs female:  $r^2 = 0.74, p < 0.0001$ ; CAPs male:  $r^2 = 0.55, p < 0.0001$ ; N = 1 animal/sex/exposure). Data represent 100 axons per animal imaged in  $\geq 3$  fields. **E-F)** The correlative relationship of axon caliber and myelin sheath thickness was affected by prenatal CAPs exposure ( $F_{3,399} = 116.7, p < 0.0001$ ). This linear relationship was sex-specific with trending significance ( $p = 0.09$ ); therefore, sexes are combined in **E** (Air:  $r^2 = 0.31, p < 0.0001$ ; CAPs:  $r^2 = 0.48, p < 0.0001$ ; N = 2 animals/exposure) and separate in **F** (Air female:  $r^2 = 0.13, p = 0.21$ ; Air male:  $r^2 = 0.34, p = 0.0004$ ; CAPs female:  $r^2 = 0.48, p < 0.0001$ ; CAPs male:  $r^2 = 0.51, p < 0.0001$ ; N = 1 animal/sex/exposure).

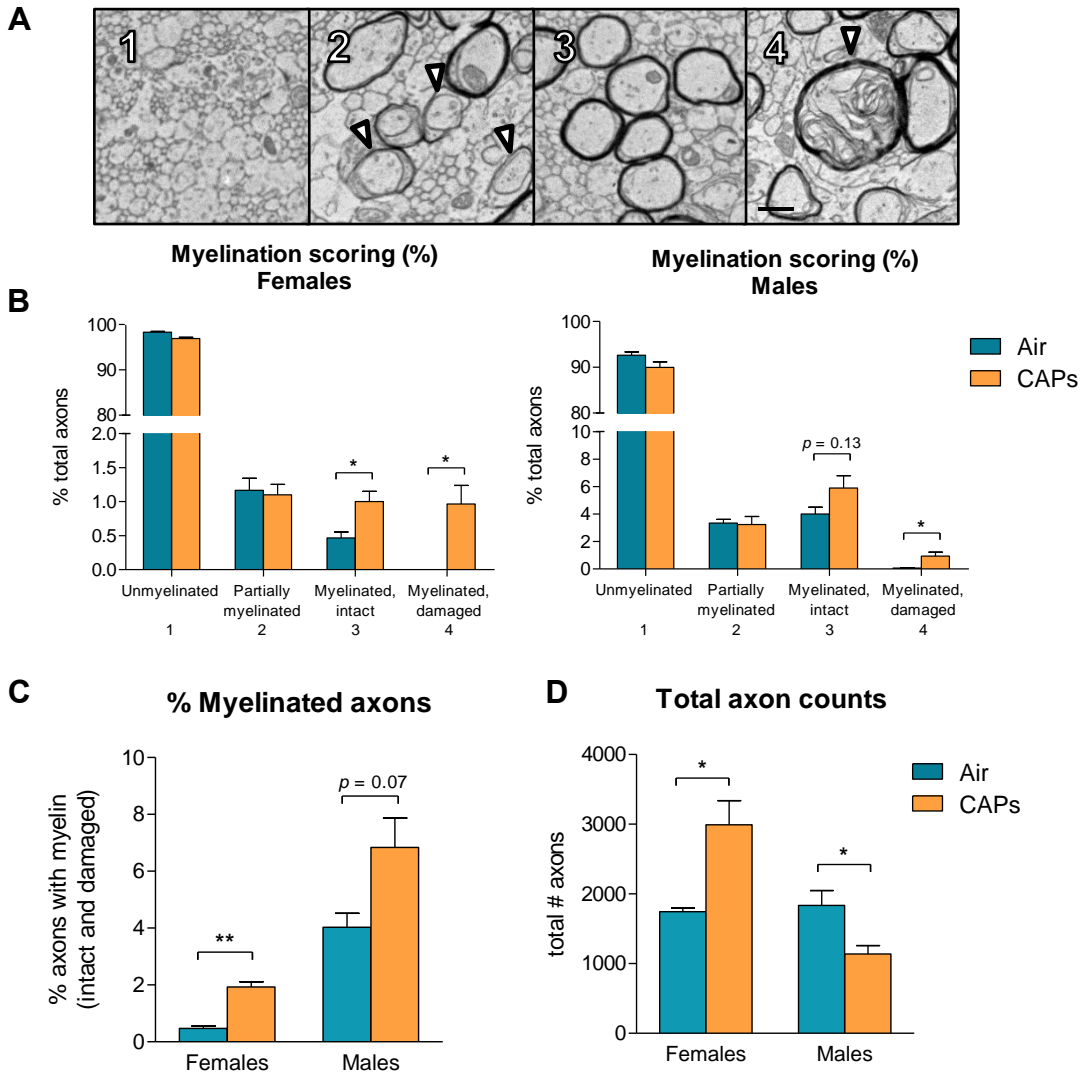

**Figure S2: The proportion of myelinated axons and axons with myelin damage and/or malformation is elevated at PND12 following gestational exposure to CAPs.** Following prior observations that myelin sheaths were damaged when imaged via high-resolution scanning transmission EM (HRSTEM), the proportion of myelinated/damaged axons (i.e. myelin sheath integrity) in the CC was determined in a separate group of animals. Tissue from the midbody CC was prepared for transmission EM, imaged, and all axons were scored/quantified in 3 separate fields using ImageJ. Scale bar represents 300 nm. **A**) Representative transmission electron micrographs of each stage of myelination scored from a CAPs-exposed male: (1) unmyelinated axons, (2) partially myelinated axons, (3) completely myelinated axons with intact myelin, and (4) completely myelinated axons with damage/evidence of malformation. **B**) Prenatal CAPs exposure increases the proportion of myelinated, intact and myelinated, damaged axons relative to Air controls in females and males. **C**) When analyzed together, the total proportion of axons with complete myelination (intact and damaged) is elevated in both CAPs-exposed females and males. **D**) The total number of axons enumerated in 3 separate fields was elevated in CAPs-exposed females and decreased in CAPs-exposed males. Data represent mean  $\pm$  SEM of 3 fields (N = 1 animal/sex/exposure). Statistical outcome: \* $p < 0.05$ , \*\* $p < 0.01$ .

## A Hierarchical clustering dendrograms

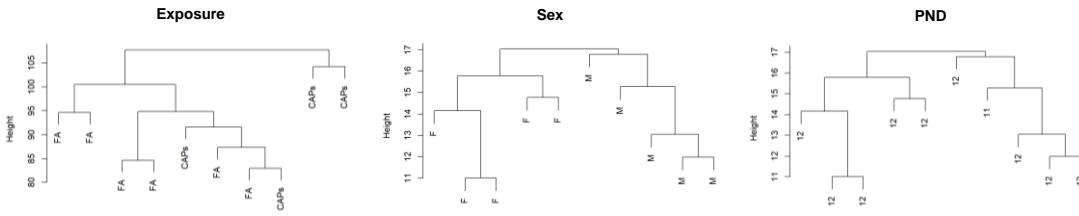

## B Variance stabilization heatmap

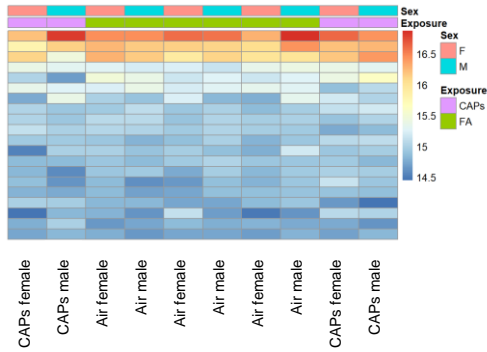

## C Principal component analysis

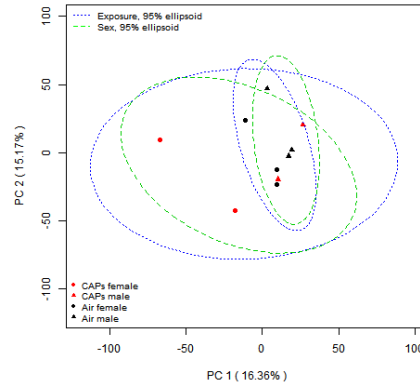

## D Mean norm. counts vs. log<sub>2</sub>FoldChange

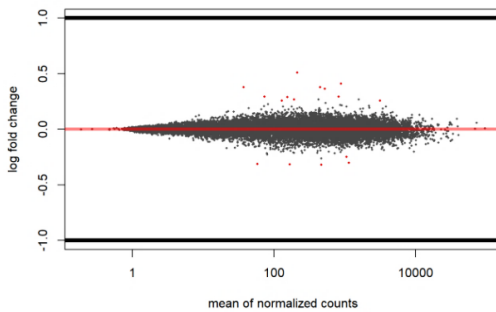

## E Effect of CAPs on global expression

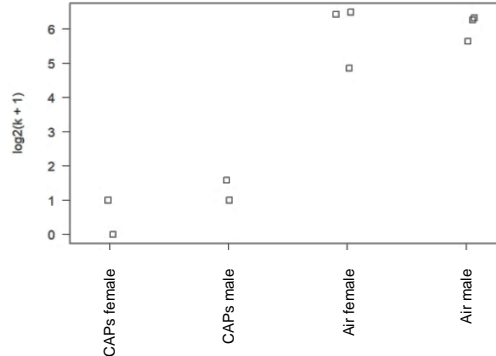

**Figure S3: Gestational CAPs exposure significantly alters global mRNA expression in males and females at PNDs 11-12.** Dissected, frozen cerebellum tissue from PNDs 11-12 was processed for RNAseq and analyzed using Bioconductor software in R. **A)** Hierarchical clustering analyses of exposure, PND, and sex. PND13 was significantly different than PNDs 11-12 (not shown), although there was no difference between PNDs 11 and 12. Thus, both PND11 and PND12 are included in analyses and PND13 is excluded. **B)** Heatmap of variance-stabilized differential gene expression. **C)** Principal component analysis of gene expression for PNDs 11 and 12 revealed no significant clustering of samples around any single factor. Ellipses indicate 95% confidence intervals for exposure (blue, dotted) and sex (green, dashed). **D)** Comparison of mean normalized gene expression counts vs. log-transformed fold change gene expression. Red points indicate statistically significant differential expression ( $p\text{-adj.} \leq 0.05$ ). **E)** Strip chart depicting overall differential gene expression between CAPs- and Air-exposed offspring (Air group indicated by 'FA'). Data represent  $N = 2\text{-}3/\text{sex/exposure}$ . Statistical outcome:  $p$ -value of log-normalized data adjusted for sex, PND, and false discovery rate  $< 0.05$ .

**Table S1: Significantly differentially expressed genes with documented neurological/neurodevelopmental associations**

| Gene symbol    | Gene name                                                   | Type of molecule encoded | Directionality of prenatal CAPs effect | Reference                 | Species   | Findings                                                                                                                                          |
|----------------|-------------------------------------------------------------|--------------------------|----------------------------------------|---------------------------|-----------|---------------------------------------------------------------------------------------------------------------------------------------------------|
| <i>Sox2ot</i>  | SRY (sex determining region Y)-box 2 overlapping transcript | lncRNA                   | Upregulated                            | Arisi et al. (2011)       | Mouse     | Increased expression suggested as a biomarker of neurodegenerative disease                                                                        |
|                |                                                             |                          |                                        | Amaral et al. (2009)      | Zebrafish | Constitutively expressed in areas of active neurogenesis; possible enhancer of neurogenesis in forebrain                                          |
| <i>Pcsk9</i>   | Proprotein convertase subtilisin/kexin type 9               | Protein                  | Upregulated                            | Seidah et al. (2003)      | Mouse     | Expression is enhanced in proliferating CGNs from E15 through PND15                                                                               |
|                |                                                             |                          |                                        | Rousselet et al. (2011)   | Mouse     | Negative regulator of cholesterol homeostasis in external granule layer of the cerebellum at PND7; expression is enhanced during neurodevelopment |
|                |                                                             |                          |                                        | Kysenius et al. (2012)    | Mouse     | RNAi knockdown reduced neuronal apoptosis in <i>ex vivo</i> CGN cultures                                                                          |
|                |                                                             |                          |                                        | Poirier et al. (2006)     | Zebrafish | Regulator of neuronal differentiation; global knockdown resulted in cerebellar disorganization and embryonic death                                |
| <i>Exosc9</i>  | Exosome component 9                                         | Protein                  | Upregulated                            | Donkervoort et al. (2017) | Human     | Homozygous recessive mutation produced cerebellar hypoplasia, hypomyelination in human infants                                                    |
|                |                                                             |                          |                                        | Arteta et al. (2016)      | Human     | Increased expression in frontal cortex of individuals with severe depression                                                                      |
| <i>Capza1</i>  | F-Actin-capping protein subunit alpha-1                     | Protein                  | Upregulated                            | Taoka et al. (1992)       | Rat       | Cerebellar expression transiently increased at PND7                                                                                               |
| <i>Zfhx2os</i> | Zinc finger homeobox 2, opposite strand                     | ncRNA                    | Downregulated                          | Komine et al. (2006)      | Mouse     | Enhanced expression in PND8 cerebellum correlates with and negatively regulates <i>Zfhx2</i> mRNA expression                                      |
|                |                                                             |                          |                                        | Komine et al. (2012)      | Mouse     | <i>Zfhx2</i> -null mice presented with neurobehavioral deficits without neuroanatomical alterations                                               |
| <i>Gas5</i>    | Growth arrest-specific 5                                    | lncRNA                   | Downregulated                          | Meier et al. (2010)       | Mouse     | Elevated hippocampal expression observed with associated memory impairments at advanced age                                                       |

| Gene symbol          | Gene name                                                                         | Type of molecule encoded | Directionality of prenatal CAPs effect | Reference                | Species    | Findings                                                                                                                                                      |
|----------------------|-----------------------------------------------------------------------------------|--------------------------|----------------------------------------|--------------------------|------------|---------------------------------------------------------------------------------------------------------------------------------------------------------------|
|                      |                                                                                   |                          |                                        | Sun et al. (2017)        | Mouse      | Suppressor of microglial M2 polarization; microglial knockdown promotes OPC survival and attenuates demyelination following EAE                               |
|                      |                                                                                   |                          |                                        | Caldwell et al. (2018)   | Mouse      | Prenatal As exposure induced sex-specific reductions at GD16 and GD18 in male offspring brain with corresponding reduction in GR; female offspring unaffected |
|                      |                                                                                   |                          |                                        | Zhao et al. (2018)       | Rat        | Significantly upregulated following neonatal hypoxic/ischemic brain injury; silencing was protective                                                          |
| <i>Kcnmb2</i>        | Potassium large conductance calcium-activated channel, subfamily M, beta member 2 | Protein                  | Downregulated                          | Katsumata et al. (2017)  | Human      | Allelic variants associated with significantly increased risk of AD                                                                                           |
| <i>Slc39a2</i>       | Solute carrier family 39                                                          | Protein                  | Downregulated                          | Peters et al. (2007)     | Mouse      | Global knockout reduced embryonic Fe uptake in maternal dietary Fe overload conditions                                                                        |
|                      |                                                                                   |                          |                                        | Liuzzi et al. (2005)     | Mouse      | mRNA expression decreases in response to inflammatory stimuli                                                                                                 |
|                      |                                                                                   |                          |                                        | Ament et al. (2015)      | Human      | Disrupting mutations observed in individuals with hereditary bipolar disorder                                                                                 |
| <i>Pabpn1</i>        | Polyadenylate-binding protein 2                                                   | Protein                  | Downregulated                          | Messaed et al. (2007)    | Human      | Allelic variant with trinucleotide repeats underlies oculopharyngeal muscular dystrophy                                                                       |
|                      |                                                                                   |                          |                                        | Dion et al. (2005)       | Mouse      | Transgenic mice expressing expanded variant exhibit neuromotor deficits and neurodegeneration                                                                 |
|                      |                                                                                   |                          |                                        | Chou et al. (2015)       | Drosophila | Reduced expression resulted in enhanced ALS-like phenotype and disease progression                                                                            |
| <i>1500004A13Rik</i> | RIKEN cDNA 1500004A13 gene                                                        | ncRNA                    | Upregulated                            | Iacono et al. (2017)     | Mouse      | OL-specific enhanced expression occurs during perinatal development periods                                                                                   |
| <i>Olfml2b</i>       | Olfactomedin-like 2B                                                              | Protein                  | Upregulated                            | Langerveld et al. (2007) | Human      | Elevated expression observed in rostral pons tissue of patients with multiple system atrophy                                                                  |



| Gene symbol  | Gene name                              | Type of molecule encoded | Directionality of prenatal CAPs effect | Reference                     | Species | Findings                                                                                                    |
|--------------|----------------------------------------|--------------------------|----------------------------------------|-------------------------------|---------|-------------------------------------------------------------------------------------------------------------|
|              |                                        |                          |                                        | Lencz et al. (2010)           | Human   | Suggested schizophrenia risk factor gene                                                                    |
|              |                                        |                          |                                        | Martin et al. (2014)          | Human   | Copy number variant reported as a risk factor for ASD and ADHD                                              |
| <i>Rpl21</i> | Ribosomal protein L21                  | Protein                  | Upregulated                            | Tajouri et al. (2003)         | Human   | Elevated expression observed in acute demyelinating lesions of patients with MS                             |
|              |                                        |                          |                                        | Riva et al. (2016)            | Human   | Significant enrichment observed in motor nerves of patients with ALS                                        |
|              |                                        |                          |                                        | Garcia-Esparcia et al. (2017) | Human   | Significant upregulation in brain tissue of patients with AD                                                |
|              |                                        |                          |                                        | Rafalski et al. (2013)        | Mouse   | Elevated expression in SIRT1-null mice corresponds with expansion of OPCs and myelinating OLs               |
|              |                                        |                          |                                        | Padhi et al. (2008)           | Rat     | Elevated expression in female cerebellum after prenatal and perinatal exposure to organochlorine pesticides |
| <i>Fcrls</i> | Fc receptor-like S, scavenger receptor | Protein                  | Upregulated                            | Parente et al. (2012)         | Mouse   | Increased expression observed in cerebellum of mice with lysosomal storage disorder                         |
|              |                                        |                          |                                        | Butovsky et al. (2014)        | Mouse   | Significantly enriched in microglia compared to macrophages                                                 |

AD = Alzheimer's disease, ADHD = attention deficit hyperactivity disorder, ALS = amyotrophic lateral sclerosis, As = arsenic, ASD = autism spectrum disorder, CGN = cerebellar granule neuron, EAE = experimental autoimmune encephalomyelitis, Fe = iron, GR = glucocorticoid receptor, lncRNA = long noncoding RNA, MS = multiple sclerosis, ncRNA = noncoding RNA, OL = oligodendrocyte, OPC = oligodendrocyte progenitor cell

No known neurological associations were found for the following significantly differentially expressed genes: *Gm5148*, *RP23-111M12.3*.

## Supplementary References

- Amaral, P.P., et al., 2009. Complex architecture and regulated expression of the Sox2ot locus during vertebrate development. *RNA* 15(11), 2013-2027.
- Ament, S.A., et al., 2015. Rare variants in neuronal excitability genes influence risk for bipolar disorder. *Proc. Natl. Acad. Sci. U. S. A.* 112(11), 3576-3581.
- Arisi, I., et al., 2011. Gene expression biomarkers in the brain of a mouse model for Alzheimer's disease: mining of microarray data by logic classification and feature selection. *J. Alzheimers Dis.* 24(4), 721-738.
- Arteta, D., et al., 2016. Transgenic animal model of mood disorders, in: Office, U.S.P.a.T. (Ed.). *Brainco Biopharma SL*
- Butovsky, O., et al., 2014. Identification of a unique TGF- $\beta$ -dependent molecular and functional signature in microglia. *Nat. Neurosci.* 17(1), 131.
- Caldwell, K.K., et al., 2018. Arsenic exposure during embryonic development alters the expression of the long noncoding RNA growth arrest specific-5 (Gas5) in a sex-dependent manner. *Neurotoxicol. Teratol.* 66, 102-112.
- Chou, C.C., et al., 2015. PABPN1 suppresses TDP-43 toxicity in ALS disease models. *Hum. Mol. Genet.* 24(18), 5154-5173.
- Dion, P., et al., 2005. Transgenic expression of an expanded (GCG)<sub>13</sub> repeat PABPN1 leads to weakness and coordination defects in mice. *Neurobiol. Dis.* 18(3), 528-536.
- Donkervoort, S., et al., 2017. Recessive mutation in EXOSC9 disrupts the exosome complex resulting in a novel form of cerebellar hypoplasia/atrophy with early motor neuronopathy. *Neuromuscul. Disord.* 27, S176-S177.
- Garcia-Esparcia, P., et al., 2017. Altered mechanisms of protein synthesis in frontal cortex in Alzheimer disease and a mouse model. *American Journal of Neurodegenerative Disease* 6(2), 15-25.
- Iacono, G., et al., 2017. Integrated transcriptional analysis unveils the dynamics of cellular differentiation in the developing mouse hippocampus. *Sci. Rep.* 7(1), 18073.
- Katsumata, Y., et al., 2017. Gene-based association study of genes linked to hippocampal sclerosis of aging neuropathology: GRN, TMEM106B, ABCC9, and KCNMB2. *Neurobiol. Aging* 53, 193 e117-193 e125.
- Komine, Y., et al., 2006. Novel transcription factor zfh-5 is negatively regulated by its own antisense RNA in mouse brain. *Mol. Cell. Neurosci.* 31(2), 273-283.
- Komine, Y., et al., 2012. Behavioral abnormalities observed in Zfhx2-deficient mice. *PLoS One* 7(12), e53114.
- Kysenius, K., et al., 2012. PCSK9 regulates neuronal apoptosis by adjusting ApoER2 levels and signaling. *Cell. Mol. Life Sci.* 69(11), 1903-1916.
- Langerveld, A.J., et al., 2007. Gene expression changes in postmortem tissue from the rostral pons of multiple system atrophy patients. *Mov. Disord.* 22(6), 766-777.
- Lencz, T., et al., 2010. Prediction of schizophrenia risk using homozygous genetic markers, in: Office, U.S.P.a.T. (Ed.). *North Shore-Long Island Jewish Research Institute*.
- Liuzzi, J.P., et al., 2005. Interleukin-6 regulates the zinc transporter Zip14 in liver and contributes to the hypozincemia of the acute-phase response. *Proc. Natl. Acad. Sci. U. S. A.* 102(19), 6843-6848.
- Martin, J., et al., 2014. Biological overlap of attention-deficit/hyperactivity disorder and autism spectrum disorder: evidence from copy number variants. *J. Am. Acad. Child Adolesc. Psychiatry* 53(7), 761-770 e726.
- Meier, I., et al., 2010. Expression of the snoRNA host gene gas5 in the hippocampus is upregulated by age and psychogenic stress and correlates with reduced novelty-induced behavior in C57BL/6 mice. *Hippocampus* 20(9), 1027-1036.
- Messaed, C., et al., 2007. Soluble expanded PABPN1 promotes cell death in oculopharyngeal muscular dystrophy. *Neurobiol. Dis.* 26(3), 546-557.
- Padhi, B.K., et al., 2008. Gene expression profiling in rat cerebellum following in utero and lactational exposure to mixtures of methylmercury, polychlorinated biphenyls and organochlorine pesticides. *Toxicol. Lett.* 176(2), 93-103.

- Parente, M.K., et al., 2012. Dysregulation of Gene Expression in a Lysosomal Storage Disease Varies between Brain Regions Implicating Unexpected Mechanisms of Neuropathology. *PLoS One* 7(3), e32419.
- Peters, J.L., et al., 2007. Targeting of the mouse *Slc39a2* (*Zip2*) gene reveals highly cell-specific patterns of expression, and unique functions in zinc, iron, and calcium homeostasis. *Genesis* 45(6), 339-352.
- Poirier, S., et al., 2006. Implication of the proprotein convertase NARC-1/PCSK9 in the development of the nervous system. *J. Neurochem.* 98(3), 838-850.
- Rafalski, V.A., et al., 2013. Expansion of oligodendrocyte progenitor cells following SIRT1 inactivation in the adult brain. *Nat. Cell Biol.* 15(6), 614-624.
- Riva, N., et al., 2016. Unraveling gene expression profiles in peripheral motor nerve from amyotrophic lateral sclerosis patients: insights into pathogenesis. *Sci. Rep.* 6, 39297.
- Rousselet, E., et al., 2011. PCSK9 reduces the protein levels of the LDL receptor in mouse brain during development and after ischemic stroke. *J. Lipid Res.* 52(7), 1383-1391.
- Seidah, N.G., et al., 2003. The secretory proprotein convertase neural apoptosis-regulated convertase 1 (NARC-1): liver regeneration and neuronal differentiation. *Proc. Natl. Acad. Sci. U. S. A.* 100(3), 928-933.
- Sun, D., et al., 2017. LncRNA GAS5 inhibits microglial M2 polarization and exacerbates demyelination. *EMBO Reports* 18(10), 1801-1816.
- Tajouri, L., et al., 2003. Quantitative and qualitative changes in gene expression patterns characterize the activity of plaques in multiple sclerosis. *Brain Res. Mol. Brain Res.* 119(2), 170-183.
- Taoka, M., et al., 1992. A rat cerebellar protein containing the cdc10/SWI6 motif. *Eur. J. Biochem.* 207(2), 615-620.
- Zhao, R.B., et al., 2018. GAS5 silencing protects against hypoxia/ischemia-induced neonatal brain injury. *Biochem. Biophys. Res. Commun.* 497(1), 285-291.
